# Supplementary material for: Endocast of the Late Triassic (Carnian) dinosaur Saturnalia tupiniquim: implications for the evolution of brain tissue in Sauropodomorpha
Source: PubMed Central journal article supplement (PMC5607302; doi:10.1038/s41598-017-11737-5), 2017-09-20
Supplement: 41598_2017_11737_MOESM1_ESM.pdf [file 41598_2017_11737_MOESM1_ESM.pdf]

## Supporting Online Material for

### **Endocast of the Late Triassic (Carnian) dinosaur *Saturnalia tupiniquim*: implications for the evolution of neurological tissues in Sauropodomorpha**

Mario Bronzati<sup>1,2,\*</sup>, Oliver W. M. Rauhut<sup>1,2</sup>, Jonathas S. Bittencourt<sup>3</sup>, Max. C. Langer<sup>4</sup>

<sup>1</sup> Bayerische Staatssammlung für Paläontologie und Geologie, Richard-Wagner-Straße 10, 80333 Munich, Germany.

<sup>2</sup> Department of Earth and Environmental Sciences and GeoBioCenter, Ludwig-Maximilians-Universität, Richard-Wagner-Straße 10, 80333 Munich, Germany.

<sup>3</sup> Departamento de Geologia, Universidade Federal de Minas Gerais, Av. Presidente Antônio Carlos 6670, 31270-901, Belo Horizonte MG, Brazil

<sup>4</sup> Laboratório de Paleontologia, FFCLRP, Universidade de São Paulo, Av. Bandeirantes 3900, 14040-901, Ribeirão Preto SP Brazil.

\*To whom correspondence should be addressed.

E-mail: m.bronzati@lrz.uni-muenchen.de; mariobronzati@gmail.com

## **SUPPLEMENTARY INFORMATION**

### **1. Institutional abbreviations**

**GPIT**, Institut und Museum für Geologie und Paläontologie, Universität Tübingen, Tübingen, Germany; **MB**, Museum für Naturkunde, Berlin, Germany; **MCP**, Museu de Ciências e Tecnologia, Pontifícia Universidade Católica do Rio Grande do Sul, Porto Alegre, Brazil; **OUMNH**, Oxford University Museum of Natural History, Oxford, UK; **SMNS**, Staatliches Museum für Naturkunde, Stuttgart, Germany; **ULBRA-PV**, Museu de Ciências Naturais, Universidade Luterana do Brasil, Canoas.

### **2. Specimen MCP-3845-PV of *Saturnalia tupiniquim***

*Saturnalia tupiniquim* is known from three specimens: MCP 3844 (holotype) - 3846-PV (see Langer, 2003 for more details). The fossils come from the Carnian Santa Maria Formation, in southern Brazil, from a locality commonly known as Cerro da Alemoa or Waldsanga (53°45' W; 29°40' S). Langer et al. (1999) provided a very preliminary description of *S. tupiniquim*, but more detailed descriptions of the pelvic (Langer, 2003) and scapular (Langer et al. 2007) girdles and limbs were provided later. The braincase is only preserved in MCP-3845-PV (Figure S1), and was never studied in detail. Its full description is under preparation, and will be presented elsewhere.

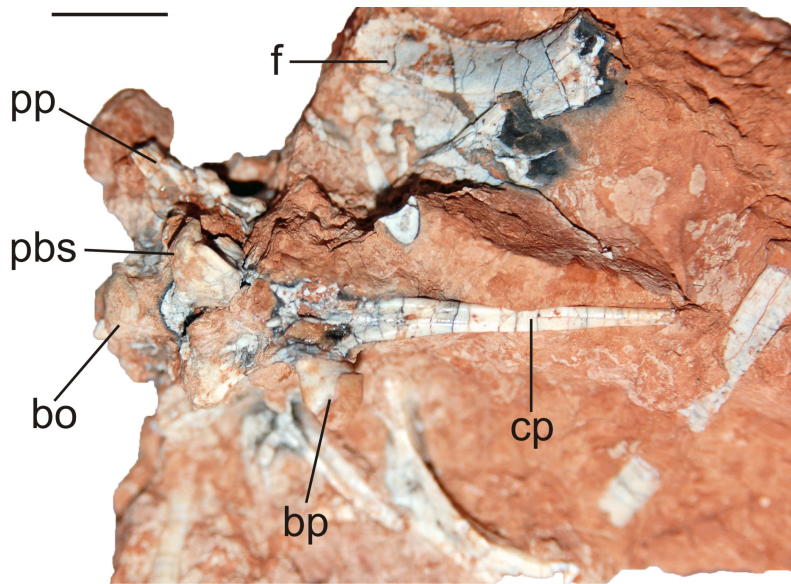

**Figure S1:** *Saturnalia tupiniquim* (MCP-3845-PV). Block containing the braincase and other skull elements. bo – basicoccipital; bp – basipterygoid process; cp – cultriform process of the parabasisphenoid; f – frontal; pbs – parabasisphenoid; pp – paroccipital process of the otoccipital. (scale bar = 10mm)

The block containing the skull of MCP-3845-PV has multiple fractures, hampering its mechanical preparation. Computed tomography was, therefore, employed in order to access the braincase osteology of *Saturnalia tupiniquim* (Figure S2).

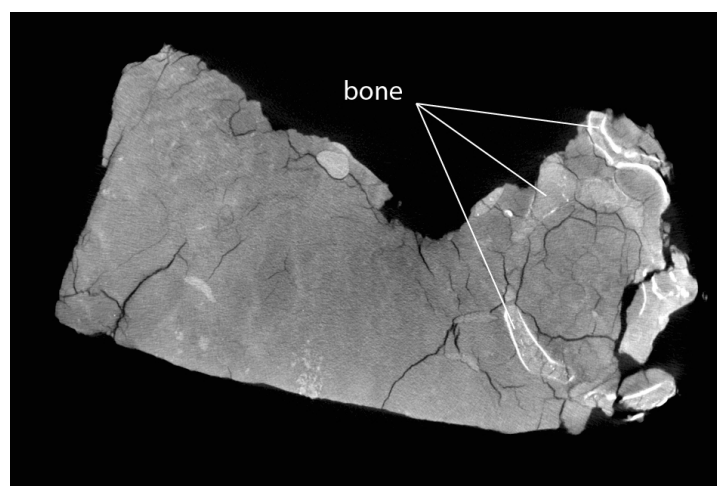

**Figure S2:** *Saturnalia tupiniquim* (MCP-3845-PV). Example of slice obtained from the Computed Tomographic. The contrast between bones and matrix allows a precise reconstruction of the osteology and soft-tissue anatomy of the braincase.

The CT-Scan data show that otoccipital (= exoccipital + opisthotic *sensu* Sampson & Witmer, 2007), parabasisphenoid, basioccipital, and supraoccipital are preserved in articulation inside the matrix (Figure S3), allowing a detailed reconstruction of the posterior portion of the endocranial cavity (see Main Document).

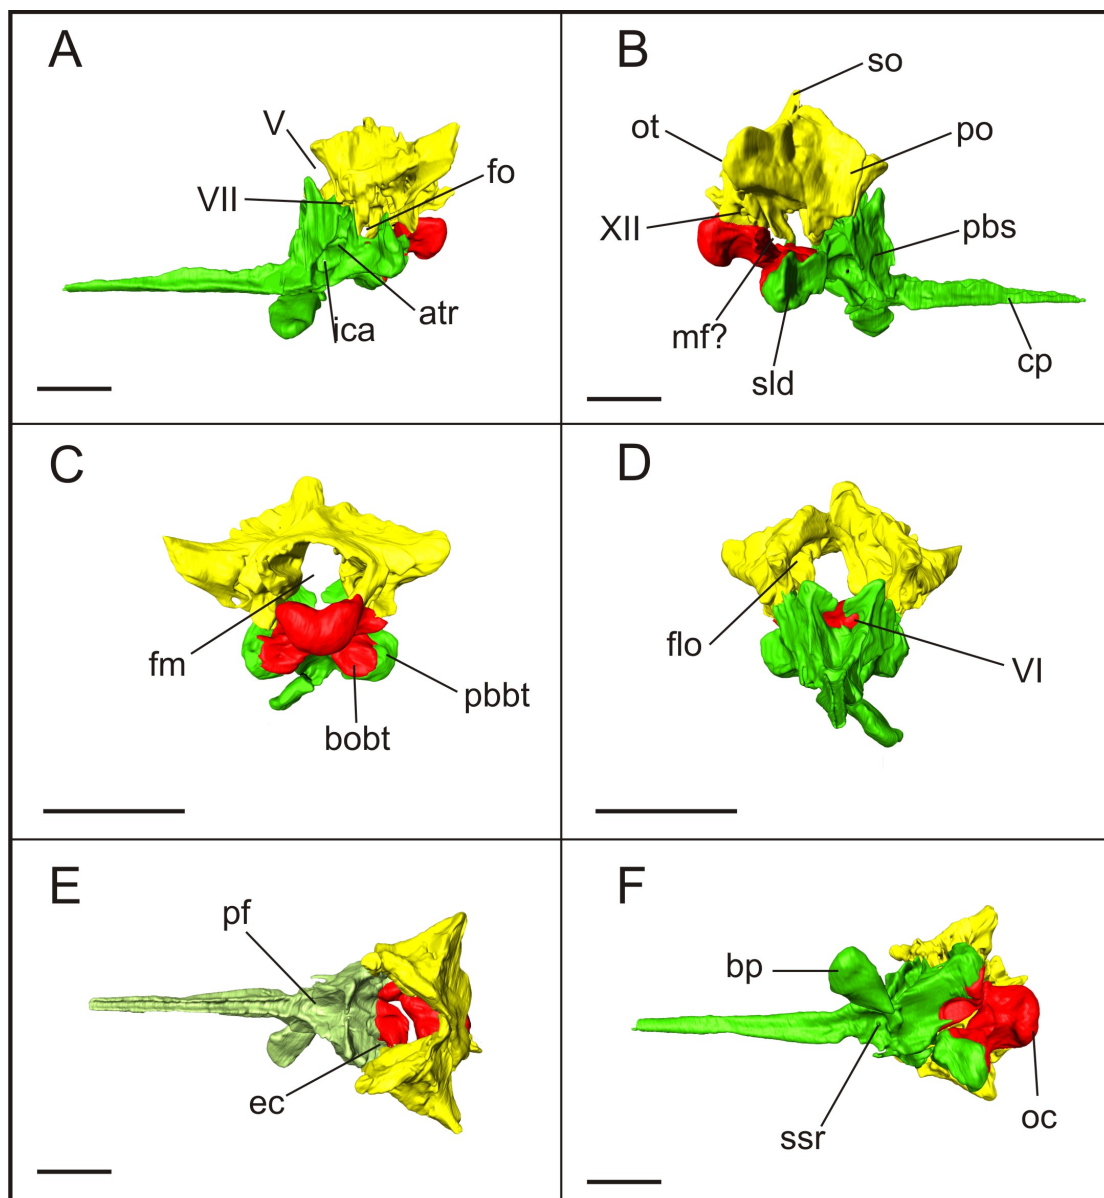

**Figure S3:** *Saturnalia tupiniquim* (MCP-3845-PV). Results of the braincase segmentation in left lateral (A), right lateral (B), occipital (C), anterior (D), dorsal (E), and ventral (F) views. atr – anterior tympanic recess; bobt - basioccipital component of the basal tubera; cp – cultriform process of the parabasisphenoid; ec –

endocranial cavity; flo – flocculus of the cerebellum; fm – foramen magnum; fo – fenestra ovalis; ica – internal carotid artery; mf – metotic foramen; ot – otoccipital; pbbt – parabasisphenoid component of the basal tubera; pbs – parabasisphenoid; pf – pituitary fossa; po – prootic; sld – semi-lunar depression; so – supraoccipital; ssr – subsellar recess; V – trigeminal nerve; VI – abducens nerve; VII – facial nerve; XII – hypoglossal nerve. (scale bars = 10 mm).

### **3. Dentition of *Saturnalia tupiniquim* and other sauropodomorphs**

Inferences on the diet of the earliest dinosaurs have been made mostly based on their tooth morphology, on a form-function correlation approach (Barrett & Rayfield, 2006). Yet, a complete separation between an omnivore and a facultative herbivore diet is usually not possible solely on the basis of tooth morphology (Barrett, 2000; Barrett & Upchurch, 2007). Nevertheless, the earliest Sauropodomorpha exhibit tooth traits that are related to a carnivorous diet, which are not seen in later members of the lineage (Figure S4 - see Main text for details).

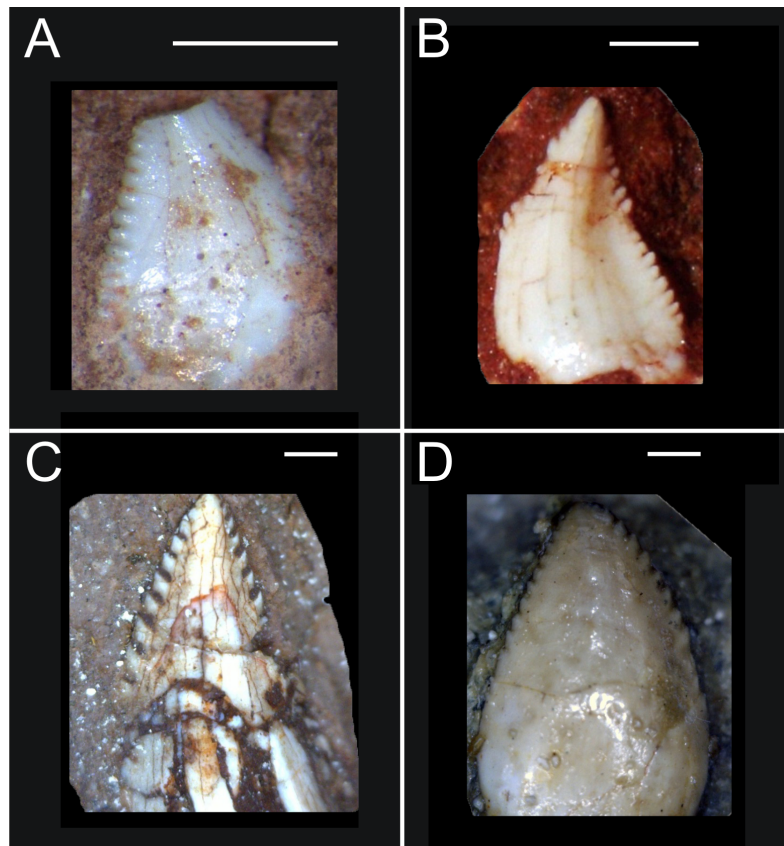

**Figure S4:** Mandibular teeth of the sauropodomorph dinosaurs *Saturnalia tupiniquim* (A), *Pampadromaeus barbareni* – ULBRA PVT 016 (B), *Efraasia minor* – SMNS 12684 (C); *Plateosaurus gracilis* – GPIT 18318a (D).

#### **4. Neck morphology of *Saturnalia tupiniquim***

One paratype of *Saturnalia tupiniquim* (MCP-3845-PV) preserved 22 semi-articulated presacral vertebrae; the atlantal intercentrum, plus neural arch, and the caudalmost trunk vertebrae are missing. A conspicuous morphological transition between presacral vertebrae 9 and 10, including a rectangular rather than parallelogram centrum shape and a larger area for the tuberculum attachment in the vertebra 10, suggests that *S. tupiniquim* has 9 “typical” cervical vertebrae (Figure S5). Indeed, the neck/trunk transition in early dinosaurs with more complete vertebral series available, e.g. *Eoraptor*, *Staurikosaurus*, *Coelophysis*, *Plateosaurus*, *Heterodontosaurus* (Santa Luca, 1980; Colbert, 1989; Galton and Upchurch, 2004; Bittencourt and Kellner,

2009; Rinehart, Lucas, Heckert, Spielmann and Celesky, 2009; Sereno, Martínez and Alcober, 2012), is positioned at presacrals 9 or 10. In the absence of further evidence concerning the exact transition point between the neck and trunk of *S. tupiniquim* (e.g. articulated ribs and scapular girdle), we estimated its neck length alternatively with 9 or 10 vertebrae. Except for *Heterodontosaurus*, the above-mentioned dinosaurs are thought to possess 15 trunk (“dorsal”) vertebrae, which is assumed herein for *S. tupiniquim*. The presacral column of *S. tupiniquim* is thus reconstructed as having 24 or 25 vertebrae.

We estimated that the neck of *S. tupiniquim* accounts for c. 56-60% of the trunk (Tables S1–S2). This is slightly elongated if compared with early dinosauriforms such as *Marasuchus* and *Silesaurus* (Sereno and Arcucci, 1994; Piechowsky and Dzik, 2010), in which this proportion is not greater than 50%. In several early dinosaurs, e.g. *Eoraptor*, *Heterodontosaurus* (Santa Luca, 1980; Sereno et al., 2012), the neck/trunk relative length varies between 50–55%. A more significant cervical elongation is seen in early neotheropods, e.g. *Coelophysis* (88%), and firstly in *Plateosaurus* (75%) among sauropodomorphs (Rauhut, Fechner, Remes and Reis, 2011). The neck elongation in *S. tupiniquim* is intermediate between that of early saurischians and plateosaurians (i.e. members of the clade Plateosauria). The paucity of anatomical data for other early sauropodomorphs (i.e., *Panphagia*, *Pampadromaeus*, and *Chromogisaurus*), or even for taxa close to plateosaurians, hampers an accurate assessment of the initial pace of cervical elongation within sauropodomorphs.

**Table S1** – Ventral length (in mm) of the presacral centra of *Saturnalia tupiniquim* (MCP-3845-PV)

| ps2* | ps3   | ps4 | ps5   | ps6   | ps7   | ps8   | ps9  | ps10† | ps11  | ps12 |
|------|-------|-----|-------|-------|-------|-------|------|-------|-------|------|
| 22   | 22.47 | --  | 23.88 | 23.13 | 22.48 | 20.25 | 18.3 | 17.67 | 16.79 | 17.9 |

| ps13 | ps14 | ps15 | ps16  | ps17  | ps18  | ps19  | ps20  | ps21  | ps22  | ps23 |
|------|------|------|-------|-------|-------|-------|-------|-------|-------|------|
| 20.2 | --   | 21.9 | 22.85 | 23.76 | 23.72 | 23.75 | 23.29 | 24.26 | 22.88 | --   |

\*Axis (including axial intercentrum)

†Last neck vertebra or first trunk vertebra

-- Incomplete centrum

**Table S2** – Estimation of the neck and trunk length (in mm) of *Saturnalia tupiniquim* (MCP-3845-PV)

|                   | Neck length<br>(min.-max.)* | Trunk length<br>(min.-max.)* | Neck-trunk<br>ratio<br>(min.-max) |
|-------------------|-----------------------------|------------------------------|-----------------------------------|
| 9 neck vertebrae  | 182.3–183.7                 | 324.9–326.6                  | 55.8–56.5%                        |
| 10 neck vertebrae | 199–200.4                   | 330.1–331.8                  | 60–60.7%                          |

\*ps4 and ps14 estimated with basis on the adjacent vertebrae (min.-max.)

\*atlas length corresponds to 1/3 of the axis

\*values for the caudalmost presacrals are based on ps22.

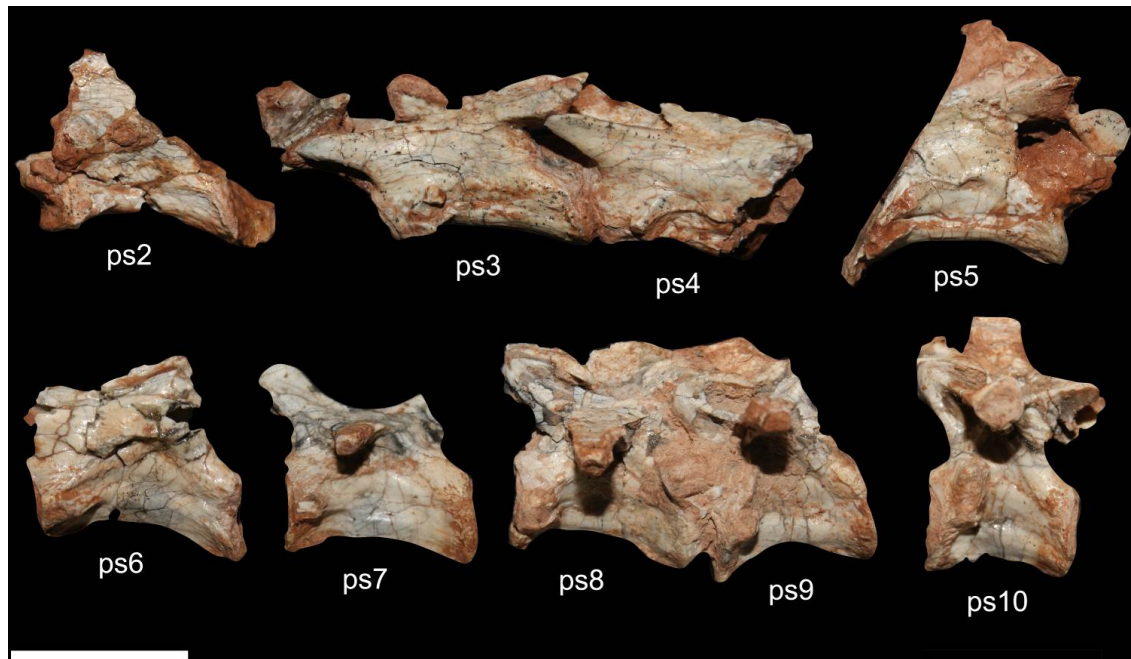

**Figure S5** – *Saturnalia tupiniquim* (MCP-3845-PV), presacral vertebrae from 2 (axis) to 10. Scale bar = 20 mm.



## 5. Additional References

- Barrett, P. M. 2000. Prosauropods and iguanas: speculation on the diets of extinct reptiles, In: (ed. H.-D. Sues) *Evolution of Herbivory in Terrestrial Vertebrates: Perspectives from the Fossil Record*. Cambridge University Press: Cambridge , pp. 42–78 .
- Barrett, P. M., Upchurch, P. 2007. The evolution of feeding mechanisms in early sauropodomorph dinosaurs. *Special Papers in Palaeontology*, 77: 91–112.
- Bittencourt, J. S. & Kellner, A. W. A. 2009. The anatomy and phylogenetic position of the Triassic dinosaur *Staurikosaurus pricei* Colbert, 1970. *Zootaxa*, 2079, 1–56.
- Colbert, E. H. 1989. The Triassic dinosaur *Coelophysis*. *Museum of Northern Arizona Bulletin*, 57, 1–160.
- Galton, P. M., Upchurch, P. 2004. Prosauropoda. In. (eds. D. B. Weishampel, P. Dodson and H. Osmólska) *The Dinosauria, second edition* University of California Press, Berkley. pp. 232–258
- Langer, M. C., Abdala, F., Richter, M., Benton, M. J. 1999. A sauropodomorph dinosaur from the Upper Triassic (Carnian) of southern Brazil. *Earth & Planetary Sciences*, 329, 511-517.
- Langer, M. C. 2003. The sacral and pelvic anatomy of the stem-sauropodomorph *Saturnalia tupiniquim* (Late Triassic, Brazil). *Paleobios* 23(2): 1–40.
- Langer, M. C., França, M.A.G., & Gabriel, S. 2007. The pectoral girdle and forelimb anatomy of the stem sauropodomorph *Saturnalia tupiniquim* (Late Triassic, Brazil). In. (eds. P. M. Barrett and D. J. Batten) *Evolution and palaeobiology of early sauropodomorph dinosaurs. Special Papers in Palaeontology*, 77, 113–137.
- Piechowsky, R. & Dzik, J. 2010. The axial skeleton of *Silesaurus opolensis*. *Journal of Vertebrate Paleontology*, 30, 1127–1141.
- Rauhut, O. W. M., Fechner, R., Remes, K. & Reis, K. 2011. How to get big in the Mesozoic: the evolution of the sauropodomorph body plan. Pp. 119-149 in N. Klein, K. Remes, C. T. Gee & M. Sander (eds) *Biology of the sauropod dinosaurs: understanding the life of giants*, Indiana University Press, Bloomington.
- Rinehart, L. F., Lucas, S. G., Heckert, A. B., Spielmann, J. A. & Celsky, M. D. 2009. The paleobiology of *Coelophysis bauri* (Cope) from the Upper Triassic (Apchean Whitaker quarry, New Mexico), with detailed analysis of a single quarry block. *Bulletin of the New Mexico Museum of Natural History and Science*, 45, 1–260.
- Sampson, S. D., Witmer, L. M. 2007. Craniofacial anatomy of *Majungasaurus crenatissimus* (Theropoda: Abelisauridae) from the Late Cretaceous of Madagascar. *Journal of Vertebrate Paleontology*, 27:32 – 102.
- Santa Luca, A. P. 1980. The postcranial skeleton of *Heterodontosaurus tucki* (Reptilia, Ornithischia) from the Stormberg of South Africa. *Annals of the South African Museum*, 79, 159–211.

- Sereno, P. C. & Arcucci, A. B. 1994. Dinosaurian precursors from the Middle Triassic of Argentina: *Marasuchus lilloensis*, n. gen. *Journal of Vertebrate Paleontology*, 14, 53–73.
- Sereno, P. C., Martínez, R. N. & Alcober, O. 2012. Osteology of *Eoraptor lunensis* (Dinosauria, Sauropodomorpha). *Journal of Vertebrate Paleontology*, 32:sup 1, 83-179.
